# Supplementary material
Source: HighWire-hosted journal article supplement (https://bmjopen.bmj.com/content/13/8/e070913)
Supplement: inline-supplementary-material-1 [file inline-supplementary-material-1.pdf]

**Supplemental Table 1: Assessments at different time points throughout the study:**

| Assessments             | Before Intervention | After Intervention |         |         |         |         |         |         |         |         |          |          |          |
|-------------------------|---------------------|--------------------|---------|---------|---------|---------|---------|---------|---------|---------|----------|----------|----------|
|                         | Baseline Month 0    | Month 1            | Month 2 | Month 3 | Month 4 | Month 5 | Month 6 | Month 7 | Month 8 | Month 9 | Month 10 | Month 11 | Month 12 |
| Height                  | X                   |                    |         |         |         |         |         |         |         |         |          |          |          |
| Weight                  | X                   | X                  | X       | X       | X       | X       | X       | X       | X       | X       | X        | X        | X        |
| Sociodemographic        | X                   |                    |         |         |         |         |         |         |         |         |          |          |          |
| 24 hours dietary recall | X                   | X                  | X       | X       | X       | X       | X       | X       | X       | X       | X        | X        | X        |
| GPAQ                    | X                   | X                  | X       | X       | X       | X       | X       | X       | X       | X       | X        | X        | X        |
| SSQ                     |                     |                    |         | X       |         |         | X       |         |         | X       |          |          | X        |
| IDIs                    |                     |                    |         |         |         |         |         |         |         |         |          |          | X        |

GPAQ= Global Physical Activity Questionnaire, SSQ= Social Support Questionnaire, IDIs= In-depth Interviews
