# Supplementary material
Source: HighWire-hosted journal article supplement (https://bmjopen.bmj.com/content/13/8/e070913)
Supplement: inline-supplementary-material-5 [file inline-supplementary-material-5.pdf]

**Supplemental Table 4: Description of individual questions of the social support questionnaire (SSQ):**

| Questions                                                                        | 3 months<br>(n=45) | 6 months<br>(n=39) | 9 months<br>(n=38) | 12 months<br>(n=39) |
|----------------------------------------------------------------------------------|--------------------|--------------------|--------------------|---------------------|
| <b>Diet-Encouragement</b>                                                        |                    |                    |                    |                     |
| 1. Encouraged me not to eat high-salt, high-fat foods when I'm tempted to do so. | 3.5 ± 1.3          | 3.8 ± 1.1          | 3.7 ± 1.2          | 3.4 ± 1.2           |
| 2. Discussed my eating habit changes with me.                                    | 2.9 ± 1.2          | 3.3 ± 1.1          | 3.5 ± 1.4          | 3.4 ± 1.1           |
| 3. Reminded me not to eat high-salt, high-fat foods.                             | 3.4 ± 1.2          | 3.6 ± 1.1          | 3.4 ± 1.2          | 3.2 ± 1.1           |
| 4. Asked me for ideas on how they can eat healthier diets.                       | 2.9 ± 1.1          | 3.3 ± 1.0          | 3.2 ± 1.3          | 3.1 ± 1.1           |
| 5. Offered me low-salt, low-fat snacks.                                          | 2.2 ± 1.5          | 2.4 ± 1.3          | 2.1 ± 1.3          | 1.6 ± 1.1           |
| 6. Commented if I went back to eating high-salt, high-fat foods.                 | 1.8 ± 1.3          | 1.8 ± 1.3          | 1.7 ± 1.2          | 1.3 ± 0.8           |
| <b>Diet-Sabotage</b>                                                             |                    |                    |                    |                     |
| 7. Ate high-salt or high-fat foods in front of me.                               | 1.1 ± 0.3          | 1.1 ± 0.4          | 1 ± 0              | 1 ± 0               |
| 8. Brought home high-salt, high-fat foods.                                       | 1.1 ± 0.3          | 1 ± 0              | 1 ± 0              | 1 ± 0               |
| 9. Offered me high-salt, high-fat foods.                                         | 1 ± 0.1            | 1 ± 0              | 1 ± 0              | 1 ± 0               |
| 10. Requested high-salt, high-fat foods.                                         | 1.1 ± 0.3          | 1 ± 0              | 1 ± 0              | 1 ± 0               |
| 11. Criticised the food I eat.                                                   | 1 ± 0.3            | 1 ± 0              | 1 ± 0              | 1 ± 0               |
| 12. Refused to eat the healthy foods I prepared.                                 | 1.1 ± 0.3          | 1 ± 0              | 1 ± 0              | 1 ± 0               |
| 13. Told me if I keep eating low-fat foods, I'll get to be too skinny.           | 1 ± 0              | 1 ± 0              | 1 ± 0              | 1 ± 0               |
| <b>Physical activity-Encouragement</b>                                           |                    |                    |                    |                     |
| 1. Exercised with me.                                                            | 1.4 ± 1.0          | 1.4 ± 1.1          | 1.2 ± 0.7          | 1.4 ± 1.0           |

|                                                             |           |           |           |           |
|-------------------------------------------------------------|-----------|-----------|-----------|-----------|
| 2. Gave me encouragement to stick with my exercise program. | 3.3 ± 1.4 | 3.7 ± 1.3 | 3.4 ± 1.6 | 3.1 ± 1.3 |
| 3. Changed their schedule so we could exercise together.    | 1.6 ± 1.0 | 1.5 ± 0.9 | 1.3 ± 0.7 | 1.3 ± 0.7 |
| 4. Offered to exercise with me.                             | 1.4 ± 1.0 | 1.4 ± 1.0 | 1.4 ± 1.0 | 1.4 ± 0.8 |
| 5. Gave me helpful reminders to exercise.                   | 3.2 ± 1.4 | 3.3 ± 1.3 | 2.7 ± 1.4 | 2.7 ± 1.2 |
| 6. Planned for exercise on recreational outings.            | 1.8 ± 1.1 | 1.8 ± 1.1 | 1.4 ± 0.8 | 1.2 ± 0.5 |
| 7. Discussed exercise with me.                              | 2.6 ± 1.2 | 2.6 ± 1.1 | 2.2 ± 1.1 | 2.3 ± 1.0 |
| 8. Talked about how much they like to exercise.             | 2.3 ± 1.1 | 2.4 ± 1.0 | 2.1 ± 1.0 | 2.2 ± 1.0 |
| 9. Helped plan activities around my exercise.               | 2.0 ± 1.2 | 2.1 ± 1.3 | 1.5 ± 1.0 | 1.2 ± 0.6 |
| 10. Asked me for ideas on how they can get more exercise.   | 2.3 ± 1.2 | 2.3 ± 1.0 | 1.9 ± 1.1 | 2.1 ± 1.0 |
| 11. Took over chores so I had more time to exercise.        | 2.4 ± 1.4 | 2.3 ± 1.3 | 1.9 ± 1.2 | 1.3 ± 0.7 |
| 12. Made positive comments about my physical appearance.    | 2.4 ± 1.1 | 2.5 ± 1.0 | 2.5 ± 1.1 | 2.6 ± 1.0 |
| <b>Rewards and punishments</b>                              |           |           |           |           |
| 13. Got angry at me for exercising.                         | 1 ± 0     | 1 ± 0     | 1 ± 0     | 1 ± 0     |
| 14. Criticised me or made fun of me for exercising.         | 1 ± 0     | 1 ± 0     | 1 ± 0     | 1 ± 0     |
| 15. Gave me rewards for exercising.                         | 1 ± 0     | 1 ± 0     | 1 ± 0     | 1 ± 0     |

\*Values are presented as mean ± SD. Scores are reported on a 1–5 scale, where 1 represents the statement was almost never and 5 almost always
